# Supplementary material
Source: PubMed Central journal article supplement (PMC11005940)
Supplement: NIHMS1977684-supplement-Data_S1.pdf [file NIHMS1977684-supplement-Data_S1.pdf]

## **Supplemental Information**

### **Ligand recognition and allosteric regulation of DRD1-Gs signaling complexes**

**Peng Xiao, Wei Yan, Lu Gou, Ya-Ni Zhong, Liangliang Kong, Chao Wu, Xin Wen, Yuan Yuan, Sheng Cao, Changxiu Qu, Xin Yang, Chuan-Cheng Yang, Anjie Xia, Zhenquan Hu, Qianqian Zhang, Yong-Hao He, Dao-Lai Zhang, Chao Zhang, Gui-Hua Hou, Huanxiang Liu, Lizhe Zhu, Ping Fu, Shengyong Yang, Daniel M. Rosenbaum, Jin-Peng Sun, Yang Du, Lei Zhang, Xiao Yu, and Zhenhua Shao**

**Table S1. Cryo-EM data collection, refinement and validation statistics. Related to Figure 1.**

| <b>Data collection and processing</b> | Fenoldopam-DRD1-Gs-Nb35 | A77636-DRD1-Gs-Nb35 | SKF83959-DRD1-Gs-Nb35 | PW0464-DRD1-Gs-Nb35 | Dopamine-PAM-DRD1-Gs-Nb35 |
|---------------------------------------|-------------------------|---------------------|-----------------------|---------------------|---------------------------|
| Magnification                         | 22,500                  | 22,500              | 105,000               | 22,500              | 22,500                    |
| Voltage (kV)                          | 300                     | 300                 | 300                   | 300                 | 300                       |
| Electron exposure (e <sup>-</sup> /Å) | 64                      | 64                  | 44                    | 64                  | 64                        |
| Defocus range (μm)                    | -1.0~-2.0               | -1.0~-2.0           | -1.0~-2.5             | -1.0~-2.0           | -1.0~-2.0                 |
| Pixel size (Å)                        | 1.0                     | 1.0                 | 0.85                  | 1.0                 | 1.0                       |
| Symmetry imposed                      | C1                      | C1                  | C1                    | C1                  | C1                        |
| Initial particle images (no.)         | 2,386,124               | 1,593,784           | 1,545,798             | 2,361,261           | 2,796,536                 |
| Final particle images (no.)           | 539,327                 | 391,771             | 130,203               | 672,890             | 584,166                   |
| Map resolution (Å)                    | 3.2                     | 3.5                 | 3.3                   | 3.1                 | 3.1                       |
| FSC threshold                         | 0.143                   | 0.143               | 0.143                 | 0.143               | 0.143                     |
| Map resolution range (Å)              | 3.0-4.2                 | 3.3-4.4             | 3.0-4.8               | 2.9-4.1             | 2.9-4.2                   |
| <b>Refinement</b>                     |                         |                     |                       |                     |                           |
| Initial model used (PDB code)         | 3SN6                    | 3SN6                | 3SN6                  | 3SN6                | 3SN6                      |
| Model resolution (Å)                  | 3.2                     | 3.5                 | 3.3                   | 3.1                 | 3.1                       |
| FSC threshold                         | 0.143                   | 0.143               | 0.143                 | 0.143               | 0.143                     |
| Model resolution range (Å)            | 3.0-4.2                 | 3.3-4.4             | 3.0-4.8               | 2.9-4.1             | 2.9-4.2                   |
| Map sharpening <i>B</i> factor (Å)    | -109                    | -163                | -106                  | -117                | -106                      |
| <b>Model composition</b>              |                         |                     |                       |                     |                           |
| Non-hydrogen atoms                    | 8112                    | 8112                | 8068                  | 8128                | 8133                      |
| Protein residues                      | 1035                    | 1035                | 1035                  | 1038                | 1038                      |
| Ligands                               | 1                       | 1                   | 1                     | 1                   | 2                         |
| Lipid                                 | 1                       | 1                   | 0                     | 1                   | 1                         |
| <b><i>B</i> factor (Å)</b>            |                         |                     |                       |                     |                           |
| Protein                               | 58.3                    | 82.3                | 107                   | 43.1                | 51.5                      |
| Ligand                                | 68.1                    | 81.4                | 115                   | 46.4                | 55.1                      |
| Lipid                                 | 65.9                    | 82.5                | -                     | 40.1                | 42.1                      |
| <b>R.m.s. deviations</b>              |                         |                     |                       |                     |                           |
| Bond lengths (Å)                      | 0.002                   | 0.002               | 0.002                 | 0.002               | 0.002                     |
| Bond angles (°)                       | 0.51                    | 0.52                | 0.54                  | 0.47                | 0.51                      |
| <b>Validation</b>                     |                         |                     |                       |                     |                           |
| MolProbity score                      | 1.97                    | 2.05                | 1.83                  | 2.17                | 1.97                      |
| Clashscore                            | 13.4                    | 12.4                | 10.4                  | 13.4                | 20.22                     |
| <b>Ramachandran plot</b>              |                         |                     |                       |                     |                           |
| Favored (%)                           | 97.1                    | 96.9                | 96.9                  | 95.9                | 97.1                      |
| Allowed (%)                           | 2.9                     | 3.1                 | 3.1                   | 4.1                 | 2.9                       |

**Table S2. Summary of ligand competition binding assays with DRD1. Related to the STAR Methods section “Radioligand binding assay”.**

| Mutation               | Ki (nM)       | Fold      | n | Ki (nM)           | Fold      | n | Ki (nM)       | Fold       | n |
|------------------------|---------------|-----------|---|-------------------|-----------|---|---------------|------------|---|
|                        | <b>A77636</b> |           |   | <b>Fenoldopam</b> |           |   | <b>PW0464</b> |            |   |
| WT                     | 1.55±0.34     | 1.0       | 4 | 5.47±0.63         | 1.0       | 4 | 14.34±0.418   | 1.0        | 4 |
| D103 <sup>3,32</sup> A | ND            | ND        | 3 | ND                | ND        | 3 | ND            | ND         | 3 |
| S198 <sup>5,42</sup> A | ND            | ND        | 3 | ND                | ND        | 3 | ND            | ND         | 3 |
| S202 <sup>5,46</sup> A | 3.58±0.33     | 3.2±0.22  | 3 | 26.43±1.16        | 4.83±0.21 | 3 | 33.26±2.61    | 2.32±0.18  | 3 |
| K81 <sup>2,61</sup> A  | 1.87±0.22     | 1.21±0.14 | 3 | 8.66±1.19         | 1.58±0.22 | 3 | 931.89±76.12  | 64.98±5.31 | 3 |
| W99 <sup>3,28</sup> F  | 1.83±0.06     | 1.19±0.04 | 3 | 10.31±1.592       | 1.88±0.29 | 3 | 475.52±60.02  | 33.16±4.19 | 3 |
| W321 <sup>7,43</sup> A | ND            | ND        | 3 | ND                | ND        | 3 | ND            | ND         | 3 |

ND means not detected. “—” means no measurement.

**Table S3. Summary of A77636 and fenoldopam induced cAMP accumulations assays of DRD1. Related to the STAR Methods section “cAMP functional assays”.**

| Mutation               | EC <sub>50</sub> (nM) | Fold         | E <sub>max</sub> (%WT) | n | EC <sub>50</sub> (nM) | Fold              | E <sub>max</sub> (%WT) | n | Expression level (%WT) |
|------------------------|-----------------------|--------------|------------------------|---|-----------------------|-------------------|------------------------|---|------------------------|
|                        | <b>A77636</b>         |              |                        |   |                       | <b>Fenoldopam</b> |                        |   |                        |
| WT                     | 7.67±1.13             | 1.00         | 100                    | 6 | 0.44±0.04             | 1.00              | 100                    | 6 | 100                    |
| D103 <sup>3,32</sup> A | 663.80±246.60         | 119.30±44.31 | 12.79±1.21             | 3 | ND                    | ND                | ND                     | 3 | 108.45 ± 9.13          |
| S198 <sup>5,42</sup> A | 452.60±202.40         | 81.34±36.38  | 90.71±0.58             | 3 | 20.65±1.06            | 46.84±2.40        | 62.48±2.39             | 3 | 112.23 ± 8.57          |
| S202 <sup>5,46</sup> A | 1203±298.40           | 216.20±53.62 | 95.43±3.54             | 3 | 1.24±0.29             | 2.80±0.67         | 69.87±4.048            | 3 | 93.56 ± 9.59           |
| K81 <sup>2,61</sup> A  | 45.02±3.42            | 8.09±0.62    | 44.60±6.59             | 3 | 0.64±0.14             | 1.44±0.31         | 85.77±1.02             | 3 | 89.22± 7.63            |
| W99 <sup>3,28</sup> F  | 54.03±5.73            | 9.71±1.03    | 95.08±2.57             | 3 | 1.41±0.13             | 3.21±0.29         | 73.78±4.78             | 3 | 118.37± 3.96           |
| W321 <sup>7,43</sup> A | 84.65±11.36           | 15.21±2.04   | 92.04±5.39             | 3 | 23.78±3.89            | 53.94±8.82        | 56.64±2.83             | 3 | 91.83± 8.46            |
| N292 <sup>6,55</sup> H | 732.10±364.40         | 131.50±65.48 | 47.26±10.11            | 3 | 11.55±0.88            | 26.19±2.00        | 40.27±2.92             | 3 | 102.75± 10.18          |
| F313 <sup>7,35</sup> V | 220.80±6.32           | 39.67±1.13   | 83.20±7.46             | 3 | 6.88±1.13             | 15.62±2.56        | 56.35±2.59             | 3 | 97.57± 6.28            |
| F129 <sup>1CL2</sup> L | 62.84±15.31           | 11.29±2.75   | 112.60±3.51            | 3 | -                     | -                 | -                      |   | 117.69± 9.13           |
| F129 <sup>1CL2</sup> A | 587.80±202.50         | 105.60±36.40 | 69.65±5.91             | 3 | -                     | -                 | -                      |   | 115.39 ± 5.32          |
| A221 <sup>5,65</sup> L | 301.60±21.99          | 54.20±3.95   | 95.88±8.98             | 3 | 7.52±0.34             | 15.35±1.84        | 97.33±3.65             | 3 | 97.23 ± 12.07          |
| Q224 <sup>5,68</sup> R | 280.80±34.48          | 50.45±6.19   | 96.28±5.56             | 3 | 1.41±0.12             | 2.88±0.42         | 96.80±7.62             | 3 | 74.89 ± 5.93           |
| I225 <sup>5,69</sup> R | 35.27±7.63            | 6.33±1.37    | 82.83±6.29             | 3 | 1.21±0.28             | 2.47±0.09         | 105.92±2.69            | 3 | 121.30 ±11.30          |
| S199 <sup>5,43</sup> A | 335.90±17.26          | 60.36±3.10   | 105.50±6.81            | 3 | 30.61±1.82            | 62.25±3.71        | 101.10±2.61            | 3 | 93.28 ± 9.27           |
| S199 <sup>5,43</sup> C | 556.80±57.54          | 100.00±10.34 | 99.71±1.78             | 3 | 691.40±66.46          | >1000             | 100.60±3.52            | 3 | 83.46 ± 9.02           |
| N292 <sup>6,55</sup> T | 688.50±59.20          | 123.70±10.64 | 106.70±3.29            | 3 | -                     | -                 | -                      |   | 113.29 ± 8.69          |
| N292 <sup>6,55</sup> L | 524.00±58.44          | 94.15±10.50  | 105.70±3.56            | 3 | -                     | -                 | -                      |   | 95.11± 9.13            |

ND means not detected. “-” means no measurement.

**Table S4. Summary of PW0464 induced cAMP accumulations assays of DRD1. Related to Figure 3C.**

| <b>Mutation</b>             | <b>EC<sub>50</sub> (nM)</b> | <b>Fold</b>  | <b>E<sub>max</sub> (%WT)</b> | <b>n</b> | <b>Expression level (%WT)</b> |
|-----------------------------|-----------------------------|--------------|------------------------------|----------|-------------------------------|
| <b>WT</b>                   | 1.81±0.34                   | 1.00         | 100                          | 6        | 100                           |
| <b>D103<sup>3,32</sup>A</b> | 659.10±44.37                | 519.00±34.94 | 89.12±3.77                   | 3        | 108.45 ± 9.13                 |
| <b>D103<sup>3,32</sup>N</b> | 15.01±1.70                  | 11.82±1.34   | 100.09±1.60                  | 3        | 98±3.45                       |
| <b>D103<sup>3,32</sup>L</b> | ND                          | ND           | ND                           | 3        | 101±9.33                      |
| <b>S198<sup>5,42</sup>A</b> | 19.34±3.12                  | 15.23±2.53   | 99.91±5.52                   | 3        | 112.23 ± 8.57                 |
| <b>S202<sup>5,46</sup>A</b> | 11.89±0.91                  | 9.36±0.71    | 106.50±12.44                 | 3        | 93.56 ± 9.59                  |
| <b>K81<sup>2,61</sup>A</b>  | 42.04±15.21                 | 33.10±11.97  | 72.00±8.89                   | 3        | 89.22± 7.63                   |
| <b>W99<sup>3,28</sup>F</b>  | 22.75±0.58                  | 17.91±0.45   | 82.88±10.37                  | 3        | 118.37± 3.96                  |
| <b>W321<sup>7,43</sup>A</b> | 65.67±5.48                  | 51.74±4.31   | 80.58±2.07                   | 3        | 91.83± 8.46                   |
| <b>N292<sup>6,55</sup>H</b> | 244.70±46.76                | 192.70±36.81 | 95.23±2.51                   | 3        | 102.75± 10.18                 |
| <b>F313<sup>7,35</sup>V</b> | 21.39±0.16                  | 16.84±0.13   | 98.84±4.92                   | 3        | 97.57± 6.28                   |
| <b>A221<sup>5,65</sup>L</b> | 78.68±5.23                  | 61.95±4.12   | 58.78±5.76                   | 3        | 97.23 ± 12.07                 |
| <b>Q224<sup>5,68</sup>R</b> | 39.47±4.56                  | 31.08±3.59   | 73.80±4.11                   | 3        | 74.89 ± 5.93                  |
| <b>I225<sup>5,69</sup>R</b> | 49.88±6.30                  | 39.28±4.96   | 72.72±2.65                   | 3        | 121.30 ± 11.30                |

ND means not detected. “–” means no measurement.

**Table S5. Summary of dopamine and SKF83959 induced cAMP accumulations assay of DRD1. Related to the STAR Methods section “cAMP functional assays”.**

| Mutation                    | EC <sub>50</sub> (nM) | Fold         | E <sub>max</sub> (%WT) | n | EC <sub>50</sub> (nM) | Fold            | E <sub>max</sub> (%WT) | n |  |
|-----------------------------|-----------------------|--------------|------------------------|---|-----------------------|-----------------|------------------------|---|--|
|                             | <b>Dopamine</b>       |              |                        |   |                       | <b>SKF83959</b> |                        |   |  |
| <b>WT</b>                   | 12.51±1.38            | 1.00         | 100                    | 6 | 0.30±0.02             | 1.00            | 100                    | 6 |  |
| <b>D103<sup>3,32</sup>A</b> | ND                    | ND           | ND                     | 3 | ND                    | ND              | ND                     | 3 |  |
| <b>S198<sup>5,42</sup>A</b> | 1521±228.70           | 156.10±23.47 | 87.66±10.07            | 3 | 487.10±45.22          | 1750±163.80     | 85.01±2.01             | 3 |  |
| <b>S202<sup>5,46</sup>A</b> | 2645±356.50           | 271.40±36.58 | 104.10±11.54           | 3 | 70.61±11.07           | 255.80±40.12    | 82.33±0.36             | 3 |  |
| <b>S199<sup>5,43</sup>A</b> | 976.70±201.20         | 96.22±3.55   | 96.02±3.17             | 3 | 31.63±0.94            | 114.60±3.42     | 100.01±4.33            | 3 |  |
| <b>S199<sup>5,43</sup>C</b> | ND                    | ND           | ND                     | 3 | 1226±30.87            | >2000           | 97.78±4.62             | 3 |  |
| <b>N292<sup>6,55</sup>H</b> | ND                    | ND           | ND                     | 3 | -                     | -               | -                      | 3 |  |
| <b>S107<sup>3,36</sup>A</b> | 2372±297.70           | 243.40±30.55 | 59.02±2.24             | 3 | -                     | -               | -                      | 3 |  |

ND means not detected. “-” means no measurement.
